# Supplementary material
Source: publisher figshare collection journal article supplement (https://acs.figshare.com/ndownloader/files/4465573)
Supplement: Supplementary file 1 [file 4465573]

# CIF Copied by cif2cif, version 0.0.8 - beta ( 2 Apr 98)
data_global
_audit_creation_method 'maXus'
_publ_contact_author_name 'B. Schweizer'
_publ_contact_author_address
;

;
_publ_contact_author_email 'schweizer@org.chem.ethz.ch'
_publ_contact_author_fax ' '
_publ_contact_author_phone ' '
_publ_section_title
;
Crystal and molecular structure of ca101109
;
_publ_section_abstract
;
We present the crystal and molecular structure of ca101109
;
_publ_section_comment
;
The study of the titled structure was undertaken to establish its three
dimensional structure.  Geometries are tabulated below.  All diagrams and
calculations were performed using maXus (Bruker Nonius, Delft & MacScience,
Japan).
;
_publ_section_synopsis
;

;
_publ_section_exptl_prep
;

;
_publ_section_exptl_refinement
;

;
_publ_section_figure_captions
;

;
_publ_section_acknowledgements
;

;
_chemical_compound_source        'LOC ETH Zurich'
_exptl_crystal_description       'Cube'
_exptl_crystal_size_max           .27
_exptl_crystal_size_mid           .195
_exptl_crystal_size_min           .135
_exptl_crystal_F_000         568.0 
_exptl_crystal_colour            'Colourless'
_diffrn_ambient_temperature     123
_cell_measurement_temperature     123
_refine_ls_hydrogen_treatment    'refall'
 
 
# Submission details
_diffrn_measurement_device  'KappaCCD'
_computing_data_collection  'KappaCCD'
_computing_data_reduction  'Denzo and Scalepak (Otwinowski & Minor, 1997)'
 
_diffrn_radiation_source  'fine-focus sealed tube'
_diffrn_reflns_limit_h_min    -10
_diffrn_reflns_limit_h_max     10
_diffrn_reflns_limit_k_min    -14
_diffrn_reflns_limit_k_max     14
_diffrn_reflns_limit_l_min    -16
_diffrn_reflns_limit_l_max     16
 
loop_
 _diffrn_radiation_wavelength     0.71073
_diffrn_radiation_wavelength_id all
 
 
_diffrn_orient_matrix_type 'X=UH'
_diffrn_orient_matrix_UB_11    0.05353
_diffrn_orient_matrix_UB_12   -0.11485
_diffrn_orient_matrix_UB_13   -0.02958
_diffrn_orient_matrix_UB_21    0.07264
_diffrn_orient_matrix_UB_22   -0.01032
_diffrn_orient_matrix_UB_23    0.05529
_diffrn_orient_matrix_UB_31   -0.04515
_diffrn_orient_matrix_UB_32   -0.03691
_diffrn_orient_matrix_UB_33    0.05385
 
_cell_formula_units_Z     4
_exptl_crystal_density_diffrn    1.703
_exptl_crystal_density_method  'not measured'
_exptl_special_details
;
?
;
_chemical_formula_weight    282.142
_diffrn_radiation_type    ' MoK\a'
 
loop_
 _symmetry_equiv_pos_as_xyz
'+X,+Y,+Z'
'-X,-Y,-Z'
 
_symmetry_space_group_name_H-M 'P -1          '
_symmetry_cell_setting 'Triclinic'
_chemical_formula_moiety 'C12 H12 Br N O2 '
_chemical_formula_sum    'C12 H12 Br N O2 '
_chemical_name_systematic
;
 ?
;
_cell_length_a          8.02570(10)
_cell_length_b           11.3647(2)
_cell_length_c           12.6017(2)
_cell_angle_alpha           90.2638(6)
_cell_angle_beta            91.1398(7)
_cell_angle_gamma          106.7051(7)
_cell_volume             1100.61(3)
_diffrn_reflns_av_R_equivalents          0.059
_diffrn_reflns_number  19915
_diffrn_reflns_theta_max  27.47
_diffrn_reflns_theta_min   3.19
_diffrn_reflns_theta_full  27.47
_cell_measurement_reflns_used     12925
_cell_measurement_theta_min        2.425
_cell_measurement_theta_max        27.485
_diffrn_measurement_method       'CCD'
_computing_cell_refinement 'HKL Scalepack (Otwinowski & Minor 1997)'
_computing_structure_solution   'SIR97(Altomare et al., J. Appl. Cryst.,1999)'
_atom_sites_solution_primary direct
_atom_sites_solution_secondary difmap
# Absorption correction
 
loop_
 _exptl_crystal_face_index_h
 _exptl_crystal_face_index_k
 _exptl_crystal_face_index_l
 _exptl_crystal_face_perp_dist
    0    9  -10  0.191
   -2    6   -1  0.197
   -2    3    7  0.147
   -2   -1   20  0.162
    2   -5   -4  0.051
  -18   -1   -1  0.049
   18    2    1  0.088
    1    4  -15  0.138
 
 
_exptl_absorpt_correction_type 'integration'
_exptl_absorpt_correction_T_min  0.389
_exptl_absorpt_correction_T_max  0.631
_exptl_absorpt_process_details
;
Gaussian integration (Coppens, 1970)
;
 
loop_
 _atom_type_symbol
 _atom_type_description
 _atom_type_scat_dispersion_real
 _atom_type_scat_dispersion_imag
 _atom_type_scat_source
 'C'  'C'   0.0033   0.0016
 'International Tables Vol C Tables 4.2.6.8 and 6.1.1.4'
 'H'  'H'   0.0000   0.0000
 'International Tables Vol C Tables 4.2.6.8 and 6.1.1.4'
 'Br'  'Br'  -0.2901   2.4595
 'International Tables Vol C Tables 4.2.6.8 and 6.1.1.4'
 'N'  'N'   0.0061   0.0033
 'International Tables Vol C Tables 4.2.6.8 and 6.1.1.4'
 'O'  'O'   0.0106   0.0060
 'International Tables Vol C Tables 4.2.6.8 and 6.1.1.4'
 
_exptl_absorpt_coefficient_mu     3.718
_reflns_number_total              5032
_reflns_number_gt                 4564
_reflns_threshold_expression      >2sigma(I)
 
_computing_structure_refinement   'SHELXL-97 (Sheldrick, 1997)'
_refine_special_details
;
 Refinement of F^2^ against ALL reflections.  The weighted R-factor wR and
 goodness of fit S are based on F^2^, conventional R-factors R are based
 on F, with F set to zero for negative F^2^. The threshold expression of
 F^2^ > 2sigma(F^2^) is used only for calculating R-factors(gt) etc. and is
 not relevant to the choice of reflections for refinement.  R-factors based
 on F^2^ are statistically about twice as large as those based on F, and R-
 factors based on ALL data will be even larger.
;
 
_refine_ls_structure_factor_coef  Fsqd
_refine_ls_matrix_type            full
_refine_ls_weighting_scheme       calc
_refine_ls_weighting_details
 'calc w=1/[\s^2^(Fo^2^)+ (0.1000P)^2^+0.0000P] where P=(Fo^2^+2Fc^2^)/3'
_refine_ls_extinction_method      none
_refine_ls_extinction_coef        ?
_refine_ls_number_reflns          5032
_refine_ls_number_parameters      385
_refine_ls_number_restraints      0
_refine_ls_R_factor_all           0.0348
_refine_ls_R_factor_gt            0.0305
_refine_ls_wR_factor_ref          0.1061
_refine_ls_wR_factor_gt           0.0994
_refine_ls_goodness_of_fit_ref    0.873
_refine_ls_restrained_S_all       0.873
_refine_ls_shift/su_max           0.001
_refine_ls_shift/su_mean          0.000
 
loop_
 _atom_site_label
 _atom_site_type_symbol
 _atom_site_fract_x
 _atom_site_fract_y
 _atom_site_fract_z
 _atom_site_U_iso_or_equiv
 _atom_site_adp_type
 _atom_site_occupancy
 _atom_site_symmetry_multiplicity
 _atom_site_calc_flag
 _atom_site_refinement_flags
 _atom_site_disorder_assembly
 _atom_site_disorder_group
Br16 Br -0.13354(3) -0.334745(18) 0.013553(18) 0.02901(10) Uani 1 1 d . . .
Br32 Br -0.08879(3) -0.176413(18) -0.337346(16) 0.02654(10) Uani 1 1 d . . .
O1 O 0.5378(2) 0.45948(13) -0.15124(12) 0.0247(3) Uani 1 1 d . . .
O9 O 0.4759(2) 0.19652(13) 0.16838(11) 0.0253(3) Uani 1 1 d . . .
O17 O 0.7274(2) 0.55479(13) -0.58270(12) 0.0255(3) Uani 1 1 d . . .
O25 O 0.75798(18) 0.17405(14) -0.36703(12) 0.0254(3) Uani 1 1 d . . .
N6 N 0.5160(2) 0.22798(15) -0.00511(13) 0.0210(3) Uani 1 1 d . . .
N22 N 0.6461(2) 0.29590(15) -0.46805(13) 0.0202(3) Uani 1 1 d . . .
C2 C 0.6694(3) 0.5008(2) -0.23176(18) 0.0296(5) Uani 1 1 d . . .
C3 C 0.7694(3) 0.4143(2) -0.19026(17) 0.0258(4) Uani 1 1 d . . .
C4 C 0.6167(2) 0.36632(17) -0.11616(15) 0.0189(4) Uani 1 1 d . . .
C5 C 0.4964(3) 0.23304(18) -0.12179(15) 0.0200(4) Uani 1 1 d . . .
C7 C 0.6333(3) 0.35335(18) 0.00505(16) 0.0204(4) Uani 1 1 d . . .
C8 C 0.4370(3) 0.15965(17) 0.07663(15) 0.0197(4) Uani 1 1 d . . .
C10 C 0.3012(2) 0.03910(17) 0.05409(15) 0.0187(4) Uani 1 1 d . . .
C11 C 0.2150(3) -0.02213(19) 0.14199(16) 0.0238(4) Uani 1 1 d . . .
C12 C 0.0876(3) -0.1333(2) 0.13106(17) 0.0259(4) Uani 1 1 d . . .
C13 C 0.0448(2) -0.18335(18) 0.03055(16) 0.0210(4) Uani 1 1 d . . .
C14 C 0.1295(3) -0.12658(19) -0.05830(17) 0.0264(4) Uani 1 1 d . . .
C15 C 0.2581(3) -0.0152(2) -0.04597(17) 0.0273(4) Uani 1 1 d . . .
C18 C 0.8068(3) 0.57922(19) -0.68690(17) 0.0243(4) Uani 1 1 d . . .
C19 C 0.7917(3) 0.44206(19) -0.70168(16) 0.0237(4) Uani 1 1 d . . .
C20 C 0.7228(2) 0.42705(17) -0.58865(15) 0.0192(4) Uani 1 1 d . . .
C21 C 0.8152(3) 0.38055(19) -0.49658(16) 0.0226(4) Uani 1 1 d . . .
C23 C 0.5490(3) 0.33310(18) -0.55746(15) 0.0204(4) Uani 1 1 d . . .
C24 C 0.6292(3) 0.19360(17) -0.41001(14) 0.0191(4) Uani 1 1 d . . .
C26 C 0.4502(2) 0.10852(17) -0.39434(14) 0.0186(4) Uani 1 1 d . . .
C27 C 0.4396(3) -0.01014(18) -0.36004(15) 0.0212(4) Uani 1 1 d . . .
C28 C 0.2802(3) -0.09370(18) -0.34137(15) 0.0218(4) Uani 1 1 d . . .
C29 C 0.1303(3) -0.05808(18) -0.35776(15) 0.0204(4) Uani 1 1 d . . .
C30 C 0.1355(3) 0.05998(19) -0.38849(16) 0.0220(4) Uani 1 1 d . . .
C31 C 0.2977(3) 0.14372(18) -0.40704(15) 0.0211(4) Uani 1 1 d . . .
H3A H 0.864(4) 0.446(3) -0.156(2) 0.031(7) Uiso 1 1 d . . .
H3B H 0.780(4) 0.352(3) -0.235(3) 0.048(9) Uiso 1 1 d . . .
H5A H 0.374(3) 0.224(2) -0.145(2) 0.021(6) Uiso 1 1 d . . .
H5B H 0.543(3) 0.180(2) -0.1580(18) 0.015(5) Uiso 1 1 d . . .
H7A H 0.744(4) 0.357(3) 0.035(2) 0.037(8) Uiso 1 1 d . . .
H7B H 0.580(4) 0.402(3) 0.042(2) 0.036(8) Uiso 1 1 d . . .
H14 H 0.092(5) -0.163(3) -0.124(3) 0.054(9) Uiso 1 1 d . . .
H18A H 0.739(4) 0.608(2) -0.733(2) 0.028(6) Uiso 1 1 d . . .
H18B H 0.919(4) 0.635(3) -0.679(2) 0.040(8) Uiso 1 1 d . . .
H19A H 0.900(3) 0.420(2) -0.713(2) 0.025(6) Uiso 1 1 d . . .
H19B H 0.717(4) 0.401(3) -0.753(2) 0.042(8) Uiso 1 1 d . . .
H21A H 0.898(3) 0.338(2) -0.5180(19) 0.020(6) Uiso 1 1 d . . .
H21B H 0.868(4) 0.449(3) -0.443(2) 0.035(7) Uiso 1 1 d . . .
H23A H 0.462(3) 0.378(3) -0.531(2) 0.026(6) Uiso 1 1 d . . .
H23B H 0.493(3) 0.267(2) -0.6088(18) 0.015(5) Uiso 1 1 d . . .
H27 H 0.541(4) -0.034(3) -0.356(2) 0.037(8) Uiso 1 1 d . . .
H28 H 0.271(4) -0.173(3) -0.319(2) 0.030(7) Uiso 1 1 d . . .
H30 H 0.034(3) 0.085(2) -0.3970(17) 0.011(5) Uiso 1 1 d . . .
H31 H 0.303(3) 0.225(2) -0.4251(19) 0.019(6) Uiso 1 1 d . . .
H2A H 0.623(4) 0.478(3) -0.305(2) 0.039(8) Uiso 1 1 d . . .
H11 H 0.245(4) 0.015(3) 0.204(2) 0.030(7) Uiso 1 1 d . . .
H12 H 0.022(4) -0.179(3) 0.194(2) 0.037(7) Uiso 1 1 d . . .
H15 H 0.306(3) 0.022(2) -0.110(2) 0.023(6) Uiso 1 1 d . . .
H2B H 0.722(4) 0.586(3) -0.222(3) 0.046(8) Uiso 1 1 d . . .
 
loop_
 _atom_site_aniso_label
 _atom_site_aniso_U_11
 _atom_site_aniso_U_22
 _atom_site_aniso_U_33
 _atom_site_aniso_U_23
 _atom_site_aniso_U_13
 _atom_site_aniso_U_12
Br16 0.02085(14) 0.02294(14) 0.03839(16) -0.00579(10) 0.00245(10) -0.00149(10)
Br32 0.02113(14) 0.02537(14) 0.02698(14) 0.00491(9) 0.00123(9) -0.00323(10)
O1 0.0305(8) 0.0201(7) 0.0250(7) 0.0066(5) 0.0057(6) 0.0095(6)
O9 0.0306(8) 0.0224(7) 0.0184(7) 0.0000(5) -0.0044(6) 0.0007(6)
O17 0.0303(8) 0.0176(7) 0.0277(7) 0.0030(5) 0.0084(6) 0.0050(6)
O25 0.0189(7) 0.0272(7) 0.0272(8) 0.0054(6) -0.0032(6) 0.0022(6)
N6 0.0273(9) 0.0160(7) 0.0161(8) 0.0009(6) -0.0021(6) 0.0007(7)
N22 0.0157(8) 0.0200(8) 0.0209(8) 0.0029(6) -0.0013(6) -0.0009(6)
C2 0.0348(12) 0.0268(11) 0.0235(10) 0.0029(8) 0.0060(9) 0.0022(9)
C3 0.0226(10) 0.0267(10) 0.0238(10) -0.0035(8) 0.0056(8) -0.0001(8)
C4 0.0194(9) 0.0166(8) 0.0206(9) -0.0004(7) 0.0029(7) 0.0050(7)
C5 0.0237(10) 0.0195(9) 0.0160(9) 0.0006(7) 0.0024(7) 0.0046(8)
C7 0.0222(9) 0.0168(8) 0.0206(9) -0.0009(7) 0.0014(7) 0.0031(7)
C8 0.0213(9) 0.0164(8) 0.0210(9) 0.0007(7) -0.0018(7) 0.0048(7)
C10 0.0190(9) 0.0174(8) 0.0197(9) 0.0011(7) -0.0022(7) 0.0056(7)
C11 0.0275(10) 0.0230(9) 0.0188(9) -0.0018(7) 0.0011(8) 0.0038(8)
C12 0.0244(10) 0.0258(10) 0.0246(10) 0.0000(8) 0.0052(8) 0.0023(8)
C13 0.0157(8) 0.0191(9) 0.0282(10) -0.0019(7) -0.0005(7) 0.0050(7)
C14 0.0333(11) 0.0212(9) 0.0205(10) -0.0011(7) -0.0045(8) 0.0012(9)
C15 0.0369(12) 0.0217(10) 0.0190(10) 0.0016(8) 0.0004(9) 0.0015(9)
C18 0.0236(10) 0.0232(10) 0.0246(10) 0.0070(8) 0.0024(8) 0.0040(8)
C19 0.0226(10) 0.0246(10) 0.0211(10) 0.0020(7) 0.0040(8) 0.0018(8)
C20 0.0190(9) 0.0167(8) 0.0206(9) 0.0009(7) 0.0026(7) 0.0030(7)
C21 0.0175(9) 0.0221(9) 0.0235(10) 0.0032(7) 0.0009(7) -0.0019(8)
C23 0.0186(9) 0.0199(9) 0.0210(9) 0.0056(7) 0.0022(7) 0.0028(8)
C24 0.0215(9) 0.0200(9) 0.0138(8) 0.0004(6) 0.0021(7) 0.0026(7)
C26 0.0188(9) 0.0196(9) 0.0145(8) 0.0001(6) 0.0008(7) 0.0008(7)
C27 0.0198(9) 0.0216(9) 0.0216(9) -0.0014(7) -0.0005(7) 0.0051(8)
C28 0.0271(10) 0.0166(9) 0.0200(9) 0.0020(7) 0.0019(7) 0.0034(8)
C29 0.0196(9) 0.0204(9) 0.0173(9) 0.0004(7) 0.0018(7) -0.0007(7)
C30 0.0202(9) 0.0245(10) 0.0205(9) 0.0025(7) 0.0018(7) 0.0052(8)
C31 0.0239(10) 0.0183(9) 0.0194(9) 0.0008(7) 0.0021(7) 0.0033(8)
 
_geom_special_details
;
 All esds (except the esd in the dihedral angle between two l.s. planes)
 are estimated using the full covariance matrix.  The cell esds are taken
 into account individually in the estimation of esds in distances, angles
 and torsion angles; correlations between esds in cell parameters are only
 used when they are defined by crystal symmetry.  An approximate (isotropic)
 treatment of cell esds is used for estimating esds involving l.s. planes.
;
 
loop_
 _geom_bond_atom_site_label_1
 _geom_bond_atom_site_label_2
 _geom_bond_distance
 _geom_bond_site_symmetry_2
 _geom_bond_publ_flag
Br16 C13 1.904(2) . ?
Br32 C29 1.9051(19) . ?
O1 C4 1.448(2) . ?
O1 C2 1.459(3) . ?
O9 C8 1.231(2) . ?
O17 C20 1.443(2) . ?
O17 C18 1.464(2) . ?
O25 C24 1.234(2) . ?
N6 C8 1.348(3) . ?
N6 C7 1.468(2) . ?
N6 C5 1.479(2) . ?
N22 C24 1.351(2) . ?
N22 C21 1.472(2) . ?
N22 C23 1.488(2) . ?
C2 C3 1.525(3) . ?
C3 C4 1.529(3) . ?
C4 C7 1.542(3) . ?
C4 C5 1.545(3) . ?
C8 C10 1.507(3) . ?
C10 C15 1.394(3) . ?
C10 C11 1.397(3) . ?
C11 C12 1.382(3) . ?
C12 C13 1.382(3) . ?
C13 C14 1.385(3) . ?
C14 C15 1.390(3) . ?
C18 C19 1.538(3) . ?
C19 C20 1.531(3) . ?
C20 C21 1.540(3) . ?
C20 C23 1.552(3) . ?
C24 C26 1.501(3) . ?
C26 C27 1.398(3) . ?
C26 C31 1.399(3) . ?
C27 C28 1.382(3) . ?
C28 C29 1.387(3) . ?
C29 C30 1.388(3) . ?
C30 C31 1.399(3) . ?
C2 H2A 1.00(3) . ?
C2 H2B 0.94(4) . ?
C3 H3A 0.85(3) . ?
C3 H3B 0.92(4) . ?
C5 H5A 0.99(2) . ?
C5 H5B 0.92(3) . ?
C7 H7A 0.95(3) . ?
C7 H7B 0.92(3) . ?
C11 H11 0.88(3) . ?
C12 H12 1.02(3) . ?
C14 H14 0.93(4) . ?
C15 H15 0.95(3) . ?
C18 H18A 0.92(3) . ?
C18 H18B 0.94(3) . ?
C19 H19A 0.99(3) . ?
C19 H19B 0.90(3) . ?
C21 H21A 0.97(3) . ?
C21 H21B 1.01(3) . ?
C23 H23A 1.03(3) . ?
C23 H23B 0.98(2) . ?
C27 H27 0.93(3) . ?
C28 H28 0.92(3) . ?
C30 H30 0.94(2) . ?
C31 H31 0.94(3) . ?
 
loop_
 _geom_angle_atom_site_label_1
 _geom_angle_atom_site_label_2
 _geom_angle_atom_site_label_3
 _geom_angle
 _geom_angle_site_symmetry_1
 _geom_angle_site_symmetry_3
 _geom_angle_publ_flag
C4 O1 C2 91.17(14) . . ?
C20 O17 C18 91.85(14) . . ?
C8 N6 C7 124.67(16) . . ?
C8 N6 C5 139.03(17) . . ?
C7 N6 C5 94.45(14) . . ?
C24 N22 C21 123.60(16) . . ?
C24 N22 C23 136.25(16) . . ?
C21 N22 C23 94.31(14) . . ?
O1 C2 C3 91.17(15) . . ?
C2 C3 C4 85.66(15) . . ?
O1 C4 C3 91.42(14) . . ?
O1 C4 C7 115.77(16) . . ?
C3 C4 C7 124.95(17) . . ?
O1 C4 C5 115.27(16) . . ?
C3 C4 C5 122.85(16) . . ?
C7 C4 C5 88.96(14) . . ?
N6 C5 C4 88.04(14) . . ?
N6 C7 C4 88.54(14) . . ?
O9 C8 N6 119.78(18) . . ?
O9 C8 C10 120.93(17) . . ?
N6 C8 C10 119.29(17) . . ?
C15 C10 C11 118.54(19) . . ?
C15 C10 C8 125.28(18) . . ?
C11 C10 C8 116.18(17) . . ?
C12 C11 C10 121.36(19) . . ?
C11 C12 C13 118.74(19) . . ?
C12 C13 C14 121.59(19) . . ?
C12 C13 Br16 119.38(15) . . ?
C14 C13 Br16 119.03(16) . . ?
C13 C14 C15 118.98(19) . . ?
C14 C15 C10 120.8(2) . . ?
O17 C18 C19 90.50(14) . . ?
C20 C19 C18 85.75(15) . . ?
O17 C20 C19 91.59(14) . . ?
O17 C20 C21 115.75(16) . . ?
C19 C20 C21 122.92(16) . . ?
O17 C20 C23 115.93(15) . . ?
C19 C20 C23 123.93(17) . . ?
C21 C20 C23 89.17(14) . . ?
N22 C21 C20 88.75(14) . . ?
N22 C23 C20 87.72(13) . . ?
O25 C24 N22 120.28(18) . . ?
O25 C24 C26 120.99(17) . . ?
N22 C24 C26 118.65(16) . . ?
C27 C26 C31 119.42(18) . . ?
C27 C26 C24 116.84(17) . . ?
C31 C26 C24 123.66(17) . . ?
C28 C27 C26 120.74(18) . . ?
C27 C28 C29 118.85(18) . . ?
C28 C29 C30 122.20(18) . . ?
C28 C29 Br32 118.35(14) . . ?
C30 C29 Br32 119.46(15) . . ?
C29 C30 C31 118.32(18) . . ?
C30 C31 C26 120.41(18) . . ?
O1 C2 H2A 112.9(17) . . ?
C3 C2 H2A 111.9(18) . . ?
O1 C2 H2B 109(2) . . ?
C3 C2 H2B 117.2(19) . . ?
H2A C2 H2B 113(3) . . ?
C2 C3 H3A 117.8(19) . . ?
C4 C3 H3A 111.7(19) . . ?
C2 C3 H3B 118(2) . . ?
C4 C3 H3B 110(2) . . ?
H3A C3 H3B 111(3) . . ?
N6 C5 H5A 112.5(15) . . ?
C4 C5 H5A 115.5(15) . . ?
N6 C5 H5B 113.6(14) . . ?
C4 C5 H5B 113.7(14) . . ?
H5A C5 H5B 112(2) . . ?
N6 C7 H7A 113.3(18) . . ?
C4 C7 H7A 118.6(17) . . ?
N6 C7 H7B 109.8(19) . . ?
C4 C7 H7B 112.5(18) . . ?
H7A C7 H7B 112(3) . . ?
C12 C11 H11 122.4(18) . . ?
C10 C11 H11 116.2(18) . . ?
C11 C12 H12 122.9(17) . . ?
C13 C12 H12 118.3(17) . . ?
C13 C14 H14 118(2) . . ?
C15 C14 H14 123(2) . . ?
C14 C15 H15 115.4(16) . . ?
C10 C15 H15 123.7(16) . . ?
O17 C18 H18A 111.5(17) . . ?
C19 C18 H18A 114.4(17) . . ?
O17 C18 H18B 109.2(18) . . ?
C19 C18 H18B 118.2(19) . . ?
H18A C18 H18B 111(2) . . ?
C20 C19 H19A 116.4(15) . . ?
C18 C19 H19A 117.2(16) . . ?
C20 C19 H19B 115(2) . . ?
C18 C19 H19B 117(2) . . ?
H19A C19 H19B 105(2) . . ?
N22 C21 H21A 112.7(14) . . ?
C20 C21 H21A 115.0(14) . . ?
N22 C21 H21B 115.5(16) . . ?
C20 C21 H21B 111.0(16) . . ?
H21A C21 H21B 112(2) . . ?
N22 C23 H23A 112.1(14) . . ?
C20 C23 H23A 110.9(15) . . ?
N22 C23 H23B 115.4(13) . . ?
C20 C23 H23B 117.8(14) . . ?
H23A C23 H23B 111(2) . . ?
C28 C27 H27 120.6(19) . . ?
C26 C27 H27 118.4(19) . . ?
C27 C28 H28 121.6(17) . . ?
C29 C28 H28 119.5(17) . . ?
C29 C30 H30 122.0(14) . . ?
C31 C30 H30 119.7(14) . . ?
C30 C31 H31 119.1(15) . . ?
C26 C31 H31 120.4(15) . . ?
 
loop_
 _geom_torsion_atom_site_label_1
 _geom_torsion_atom_site_label_2
 _geom_torsion_atom_site_label_3
 _geom_torsion_atom_site_label_4
 _geom_torsion
 _geom_torsion_site_symmetry_1
 _geom_torsion_site_symmetry_2
 _geom_torsion_site_symmetry_3
 _geom_torsion_site_symmetry_4
 _geom_torsion_publ_flag
C4 O1 C2 C3 -5.91(16) . . . . ?
O1 C2 C3 C4 5.61(15) . . . . ?
C2 O1 C4 C3 5.89(16) . . . . ?
C2 O1 C4 C7 136.31(18) . . . . ?
C2 O1 C4 C5 -121.82(17) . . . . ?
C2 C3 C4 O1 -5.65(15) . . . . ?
C2 C3 C4 C7 -128.9(2) . . . . ?
C2 C3 C4 C5 116.0(2) . . . . ?
C8 N6 C5 C4 162.8(2) . . . . ?
C7 N6 C5 C4 -0.92(15) . . . . ?
O1 C4 C5 N6 -117.32(17) . . . . ?
C3 C4 C5 N6 132.97(19) . . . . ?
C7 C4 C5 N6 0.87(15) . . . . ?
C8 N6 C7 C4 -166.14(19) . . . . ?
C5 N6 C7 C4 0.92(15) . . . . ?
O1 C4 C7 N6 116.86(17) . . . . ?
C3 C4 C7 N6 -131.36(19) . . . . ?
C5 C4 C7 N6 -0.88(15) . . . . ?
C7 N6 C8 O9 -7.8(3) . . . . ?
C5 N6 C8 O9 -167.9(2) . . . . ?
C7 N6 C8 C10 171.81(17) . . . . ?
C5 N6 C8 C10 11.7(4) . . . . ?
O9 C8 C10 C15 -174.6(2) . . . . ?
N6 C8 C10 C15 5.8(3) . . . . ?
O9 C8 C10 C11 4.5(3) . . . . ?
N6 C8 C10 C11 -175.12(18) . . . . ?
C15 C10 C11 C12 -1.0(3) . . . . ?
C8 C10 C11 C12 179.87(19) . . . . ?
C10 C11 C12 C13 -0.6(3) . . . . ?
C11 C12 C13 C14 1.8(3) . . . . ?
C11 C12 C13 Br16 -178.76(16) . . . . ?
C12 C13 C14 C15 -1.4(3) . . . . ?
Br16 C13 C14 C15 179.16(17) . . . . ?
C13 C14 C15 C10 -0.2(3) . . . . ?
C11 C10 C15 C14 1.4(3) . . . . ?
C8 C10 C15 C14 -179.5(2) . . . . ?
C20 O17 C18 C19 4.29(15) . . . . ?
O17 C18 C19 C20 -4.05(15) . . . . ?
C18 O17 C20 C19 -4.31(16) . . . . ?
C18 O17 C20 C21 123.79(17) . . . . ?
C18 O17 C20 C23 -133.69(17) . . . . ?
C18 C19 C20 O17 4.11(15) . . . . ?
C18 C19 C20 C21 -118.29(19) . . . . ?
C18 C19 C20 C23 127.20(18) . . . . ?
C24 N22 C21 C20 158.70(18) . . . . ?
C23 N22 C21 C20 1.81(15) . . . . ?
O17 C20 C21 N22 116.86(17) . . . . ?
C19 C20 C21 N22 -132.71(18) . . . . ?
C23 C20 C21 N22 -1.73(15) . . . . ?
C24 N22 C23 C20 -153.6(2) . . . . ?
C21 N22 C23 C20 -1.80(15) . . . . ?
O17 C20 C23 N22 -116.72(17) . . . . ?
C19 C20 C23 N22 131.91(18) . . . . ?
C21 C20 C23 N22 1.72(15) . . . . ?
C21 N22 C24 O25 8.7(3) . . . . ?
C23 N22 C24 O25 154.2(2) . . . . ?
C21 N22 C24 C26 -174.55(17) . . . . ?
C23 N22 C24 C26 -29.0(3) . . . . ?
O25 C24 C26 C27 -20.2(3) . . . . ?
N22 C24 C26 C27 163.07(18) . . . . ?
O25 C24 C26 C31 156.51(19) . . . . ?
N22 C24 C26 C31 -20.2(3) . . . . ?
C31 C26 C27 C28 1.7(3) . . . . ?
C24 C26 C27 C28 178.60(17) . . . . ?
C26 C27 C28 C29 0.3(3) . . . . ?
C27 C28 C29 C30 -2.4(3) . . . . ?
C27 C28 C29 Br32 177.44(15) . . . . ?
C28 C29 C30 C31 2.4(3) . . . . ?
Br32 C29 C30 C31 -177.50(14) . . . . ?
C29 C30 C31 C26 -0.2(3) . . . . ?
C27 C26 C31 C30 -1.8(3) . . . . ?
C24 C26 C31 C30 -178.42(17) . . . . ?
 
_diffrn_measured_fraction_theta_max    0.998
_diffrn_measured_fraction_theta_full   0.998
_refine_diff_density_max    0.948
_refine_diff_density_min   -0.843
_refine_diff_density_rms    0.087
 
_publ_section_references
;
Mackay, S., Gilmore, C. J.,Edwards, C., Stewart, N. & Shankland, K.
(1999). maXus  Computer Program for the Solution and Refinement of
Crystal Structures. Bruker Nonius, The Netherlands, MacScience, Japan
& The University of Glasgow.

Johnson, C. K. (1976). ORTEP-II. A Fortran Thermal-Ellipsoid Plot
Program. Report ORNL-5138. Oak Ridge National Laboratory, Oak Ridge,
Tennessee, USA.

Otwinowski, Z. and Minor, W, (1997). In Methods in Enzymology, 276,
edited by C.W. Carter, Jr. & R.M. Sweet pp. 307-326,
New York:Academic Press.

Altomare, A., Burla, M.C., Camalli, M., Cascarano, G.L.,
Giacovazzo, C., Guagliardi, A., Moliterni, A.G.G & Spagna, R.
(1999). J. Appl. Cryst. 32, 115-119.

Sheldrick, G. M. (1997).  SHELXL97.  Program for the Refinement of Crystal
Structures.  University of G\"ottingen, Germany.

Coppens, P. (1970). In Crystallographic Computing, edited by
F.R. Ahmed, S.R.Hall & C.P.Huber, pp 255-270. Copenhagen: Munksgaard.

;
 
